# Supplementary material for: Trans-synaptic zinc mobilization improves social interaction in two mouse models of autism through NMDAR activation
Source: PubMed Central journal article supplement (PMC4479043; doi:10.1038/ncomms8168), 2015-05-18
Supplement: ncomms8168-s1.pdf [file ncomms8168-s1.pdf]

# **Trans-synaptic Zinc mobilization improves social interaction in two mouse models of autism through NMDAR activation**

Eun-Jae Lee,<sup>1,3</sup> Hyejin Lee,<sup>2,3</sup> Tzyy-Nan Eugene Huang,<sup>4</sup> Changuk Chung,<sup>2,3</sup> Wangyong Shin,<sup>2,3</sup> Kyungdeok Kim,<sup>2,3</sup> Jae-Young Koh,<sup>5,6,7</sup> Yi-Ping Hsueh,<sup>4,\*</sup> and Eunjoon Kim<sup>2,3,\*</sup>

<sup>1</sup>Graduate School of Medical Science and Engineering, Korea Advanced Institute of Science and Technology (KAIST), Daejeon 305-701, Korea; <sup>2</sup>Department of Biological Sciences, Korea Advanced Institute of Science and Technology (KAIST), Daejeon 305-701, Korea; <sup>3</sup>Center for Synaptic Brain Dysfunctions, Institute for Basic Science (IBS), Daejeon 305-701, Korea; <sup>4</sup>Institute of Molecular Biology, Academia Sinica, Taipei, 115, Taiwan; <sup>5</sup>Neural Injury Research Lab, University of Ulsan College of Medicine, Seoul, Korea; <sup>6</sup>Asan Institute for Life Science, University of Ulsan College of Medicine, Seoul, Korea; <sup>7</sup>Department of Neurology, University of Ulsan College of Medicine, Seoul, Korea; \*Corresponding authors.

Correspondence: [kime@kaist.ac.kr](mailto:kime@kaist.ac.kr) (E.K.), [yph@gate.sinica.edu.tw](mailto:yph@gate.sinica.edu.tw) (Y.-P.H)

## Supplementary figures

### Suppl Fig 1

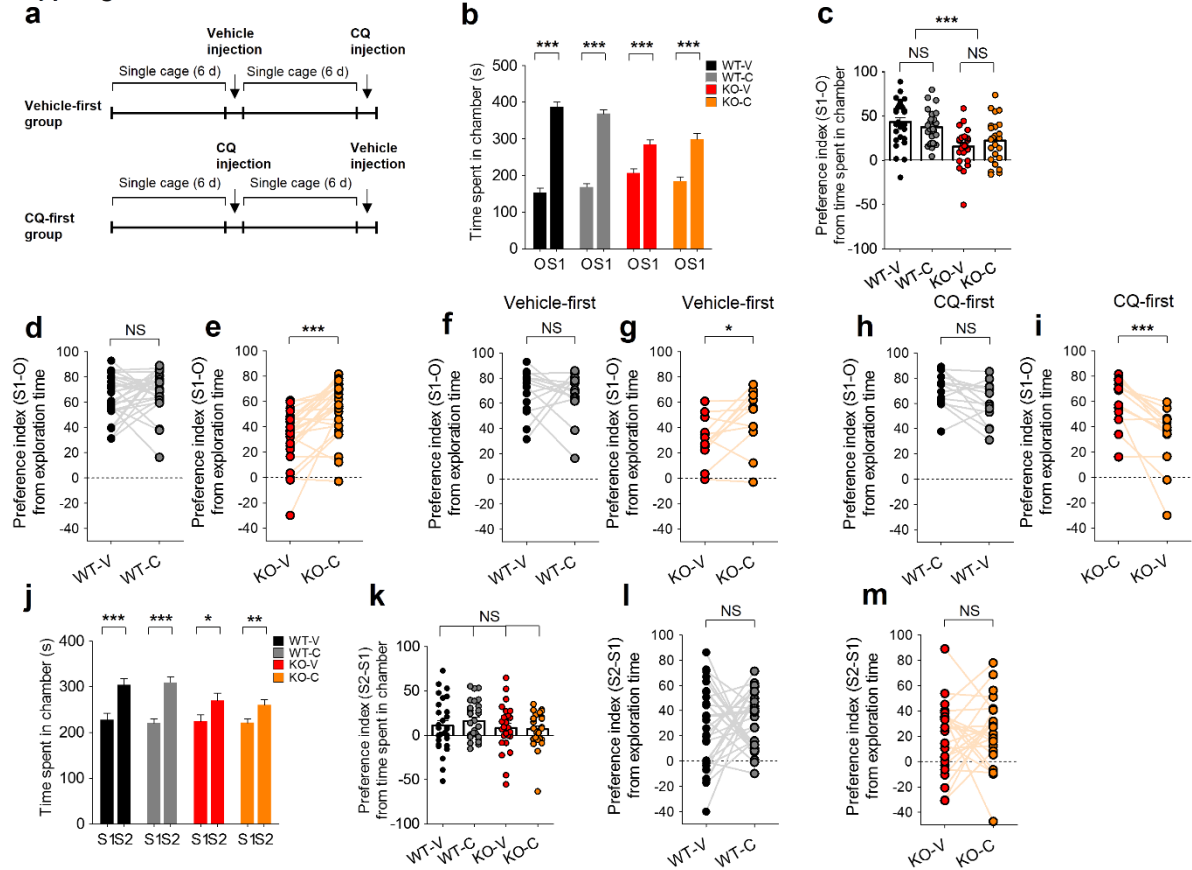

### Supplementary Fig. 1. CQ improves social interaction in *Shank2*<sup>-/-</sup> mice

(a) A schematic depicting drug-administration paradigms. Animals were divided into two experimental groups; one received vehicle first and CQ second, and the other received CQ first and vehicle second. Mice were tested 2 hours after receiving the first injection (vehicle or 30 mg kg<sup>-1</sup> CQ; i.p.). After a 6-day rest period in single cages, mice received the reciprocal treatment and were retested.

(b-m) CQ improves social interaction (b-i) but has no effect on social novelty recognition (j-m) in *Shank2*<sup>-/-</sup> (KO) mice, or on both social interaction and social novelty recognition in WT mice, as determined by time spent in exploration, preference index from exploration time, and time spent exploring/sniffing targets (S1/stranger vs. O/object, or S2/new stranger vs. S1/previous stranger). Data were analyzed as paired comparisons of the effects of CQ (before and after) within WT and KO groups, or within the vehicle-first and CQ-first groups to minimize carryover effects. (n = 28 for WT-V and WT-C, 25 for KO-V and KO-C, n = 14 for WT-V and WT-C (vehicle-first), n = 12 for KO-V and KO-C (vehicle-first), n = 14 for WT-V and WT-C (CQ-first), n = 13 for KO-V and KO-C (CQ-first), NS, not significant, \*p < 0.05, \*\*p < 0.01, \*\*\*p < 0.001, Student's t-test). Data in all panels with error bars represent mean ± s.e.m.

**Suppl Fig 2**

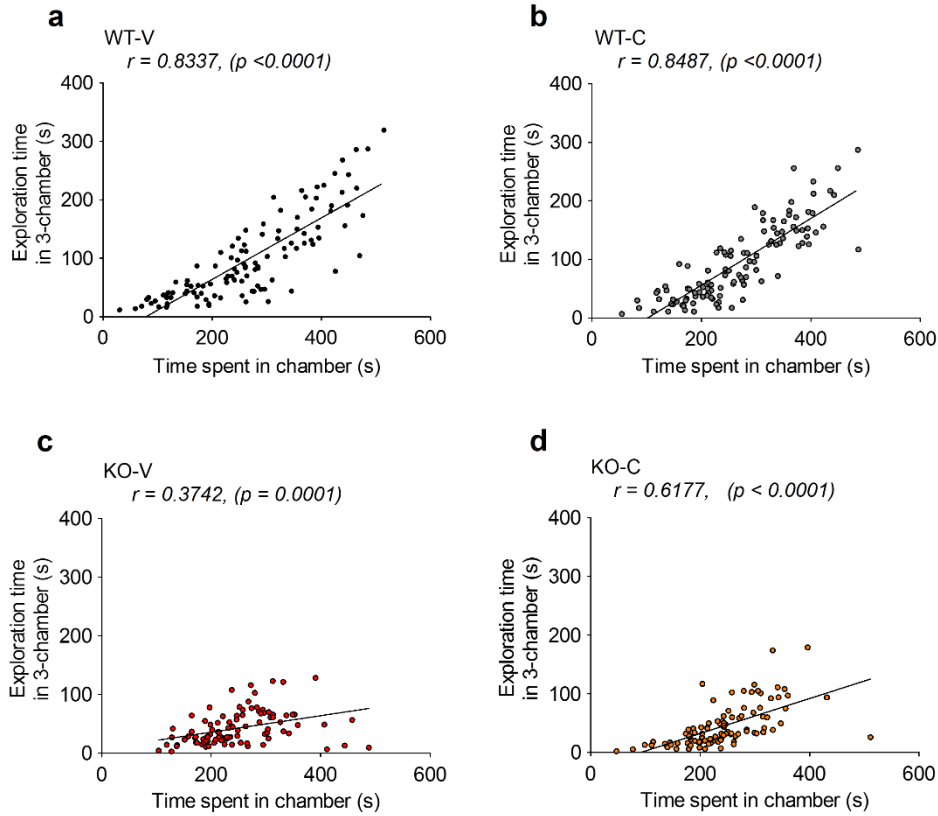

**Supplementary Fig. 2.** Limited correlation between chamber time and exploration time in *Shank2*<sup>-/-</sup> mice, relative to WT mice.

(a-d) Time spent in chamber (chamber time) and time spent in exploring/sniffing the targets (O, S1, and S2) (exploration time) do not correlate well in *Shank2*<sup>-/-</sup> mice, relative to WT mice, as determined using the data from the three-chamber social interaction results from **Fig. 1** and **Supplementary Fig. 1**. Note that this limited correlation in *Shank2*<sup>-/-</sup> mice is mildly improved by CQ treatment (Pearson correlation).

Suppl Fig 3

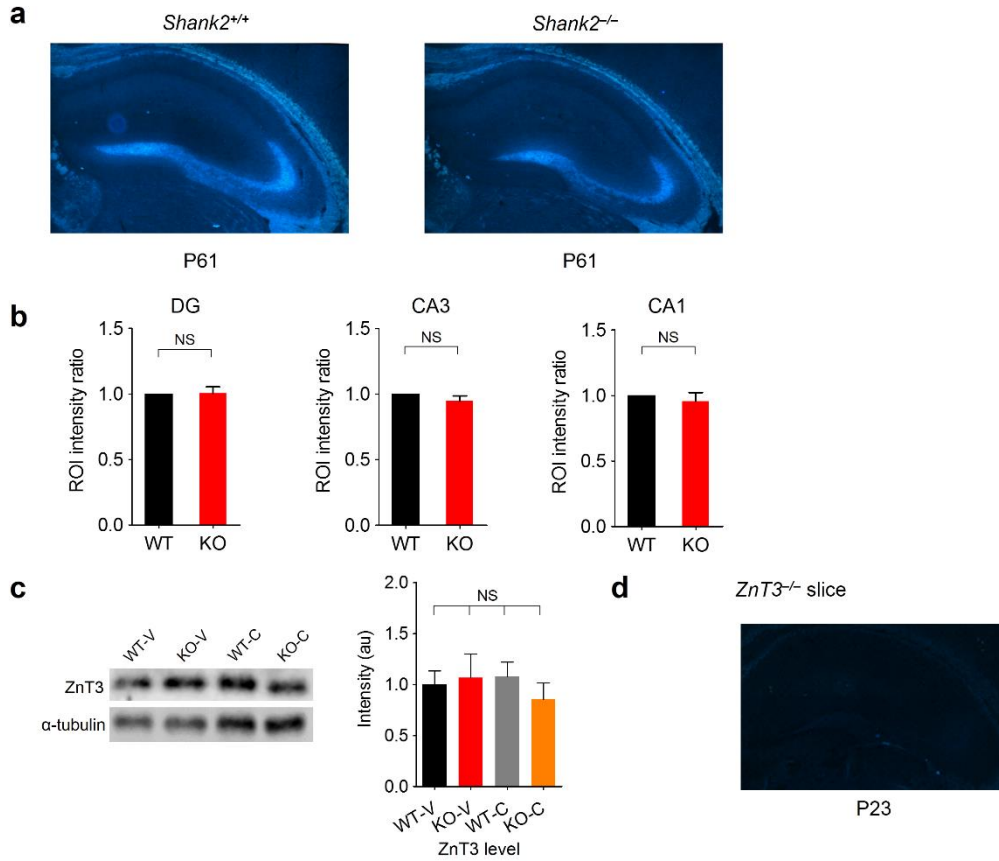

**Supplementary Fig. 3.** Free Zn levels are similar in WT and *Shank2*<sup>-/-</sup> brains, and CQ has no effect on ZnT3 protein levels

(a and b) There was no difference in the total level of free Zn between WT and *Shank2*<sup>-/-</sup> brains (8 wks), as determined using the free Zn-binding fluorescent dye, TFL-Zn. (n = 15 hippocampal slices from 3 animals for WT and KO, NS, not significant, Student's t-test). ROI, region of interest.

(c) CQ treatment has no effect on the total level of ZnT3 protein in whole brain crude synaptosomal fractions from WT and *Shank2*<sup>-/-</sup> mice (8 wks). Mice were acutely injected with CQ (30 mg kg<sup>-1</sup>; i.p.) 2 hours before sample preparation and immunoblot analysis. (n = 4 for each group, NS, not significant, one-way ANOVA). Data in all panels with error bars represent mean  $\pm$  s.e.m.

(d) Free Zn was undetectable in *ZnT3*<sup>-/-</sup> brain (postnatal day 23), as determined by TFL-Zn.

Suppl Fig 4

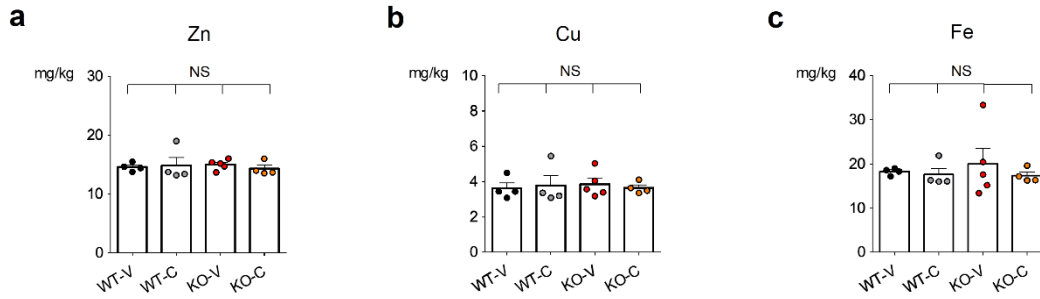

**Supplementary Fig. 4.** WT and *Shank2*<sup>-/-</sup> mice show comparable levels of Zn, Cu, and Fe in the brain, and CQ treatment has no effect on brain levels of these metals.

(a-c) WT and *Shank2*<sup>-/-</sup> mice (2–3 months) were treated with CQ (30 mg kg<sup>-1</sup>), or vehicle (DMSO), by i.p. injection for 2 hrs, followed by whole-brain metal analysis by inductively coupled plasma mass spectrometry. (n = 4 for WT-V, 4 for WT-C, 5 for KO-V, and 4 for KO-C, NS, not significant, two-way ANOVA and one-way ANOVA with Tukey's *post hoc* test). Data in all panels with error bars represent mean ± s.e.m.

Suppl Fig 5

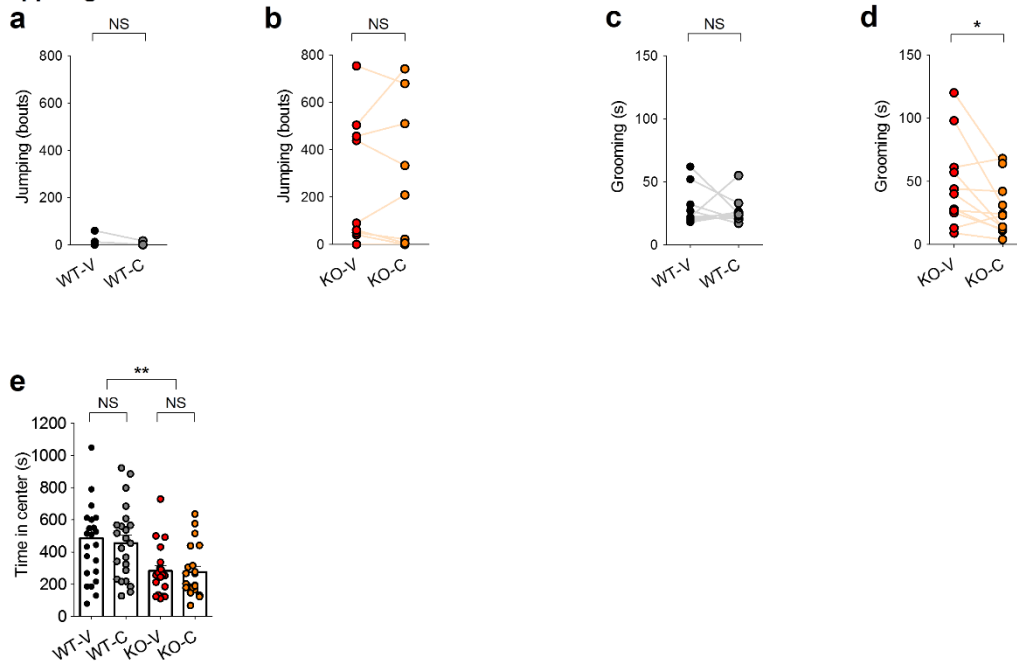

**Supplementary Fig. 5.** CQ fails to improve repetitive behavior and anxiety-like behavior in *Shank2*<sup>-/-</sup> mice

(a-d) CQ (30 mg kg<sup>-1</sup>; i.p.) injected 2 hours prior to testing fails to improve jumping and has no effect on grooming in *Shank2*<sup>-/-</sup> mice. (n = 10 for WT-V and WT-C, 11 for KO-V and for KO-C, NS, not significant, \*p < 0.05, Student's t-test)

(e) CQ has no effect on the time spent in the center region of the open field arena in WT and *Shank2*<sup>-/-</sup> mice. (n = 10 for WT-V and WT-C, 11 for KO-V and for KO-C, NS, not significant, \*p < 0.05, two-way ANOVA and Kruskal-Wallis one-way ANOVA with Dunn's *post hoc* test) Data in all panels with error bars represent mean ± s.e.m.

**Suppl Fig 6**

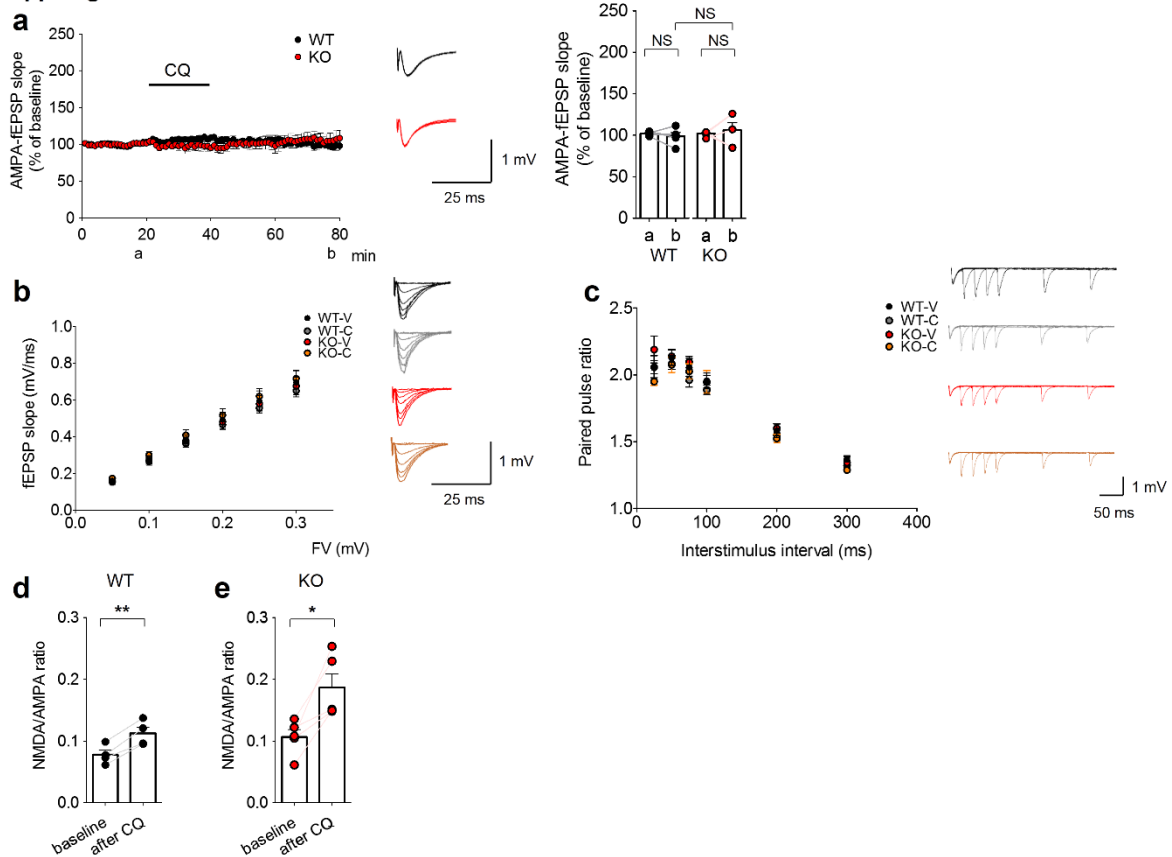

**Supplementary Fig. 6.** CQ has no effect on AMPA-fEPSPs, input-output ratio, or paired pulse ratio, but increases the NMDA/AMPA ratio of eEPSCs at *Shank2*<sup>-/-</sup> synapses

(a) CQ (4  $\mu$ M) has no effect on AMPA-fEPSPs. The labels a and b indicate 5-min duration before CQ and the end of recording, respectively. (n = 5 slices (4 animals) for WT and 5 (4) for KO, NS, not significant, Student's t-test)

(b) CQ (4  $\mu$ M) has no effect on the input-output relationship at WT or *Shank2*<sup>-/-</sup> hippocampal SC-CA1 synapses, as determined by plotting the initial slopes of AMPA-fEPSPs against amplitudes of fiber volley. (n = 9 slices (7 animals) for WT-V, 9 (7) for WT-C, 8 (5) for KO-V, and 9 (6) for KO-C, one-way ANOVA).

(c) CQ (4  $\mu$ M) has no effect on the paired pulse ratio at both WT and *Shank2*<sup>-/-</sup> hippocampal SC-CA1 synapses, as determined by plotting the ratio of first/second initial slopes of AMPA-fEPSPs against interstimulus intervals. (n = 9 slices (7 animals) for WT-V, 9 (7) for WT-C, 8 (5) for KO-V, and 9 (6) for KO-C, one-way ANOVA).

(d and e) CQ (4  $\mu$ M) increases the NMDA/AMPA ratio of eEPSCs at -40 mV in both WT and *Shank2*<sup>-/-</sup> hippocampal SC-CA1 synapses. (n = 4 cells (3 animals) for WT, and 5 (4) for KO, \*p < 0.05, Student's t-test). Data in all panels with error bars represent mean  $\pm$  s.e.m.

**Suppl Fig 7**

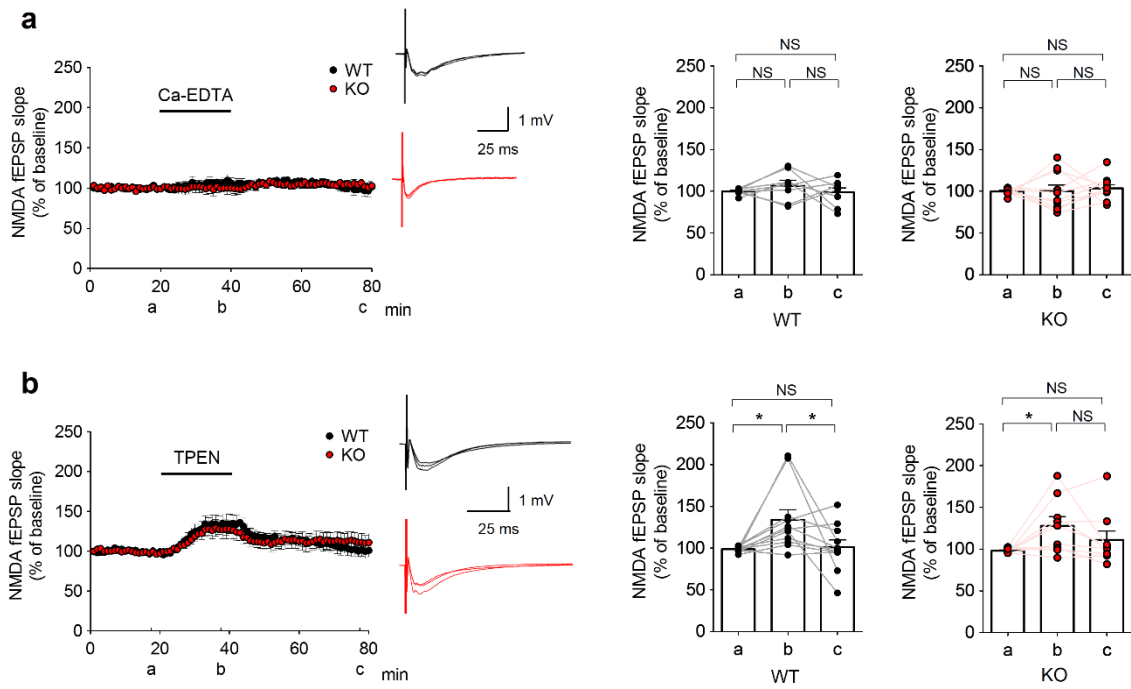

**Supplementary Fig. 7.** Ca-EDTA has no effect on the basal NMDAR function, while TPEN causes a small increase in NMDAR function.

(a and b) The effect of Ca-EDTA (2 mM) or TPEN (25  $\mu$ M) on NMDA-fEPSPs. The labels a, b, and c indicate 5-min duration before and during Ca-EDTA, and at the end of recording, respectively. (n = 8 slices (5 animals) for WT-Ca-EDTA, 10 (5) for KO-Ca-EDTA, 11 (6) for WT-TPEN, and 9 (5) for KO-TPEN, NS, not significant, \*p < 0.05, Repeated measures ANOVA). Data in all panels with error bars represent mean  $\pm$  s.e.m.



**Suppl Fig 8**

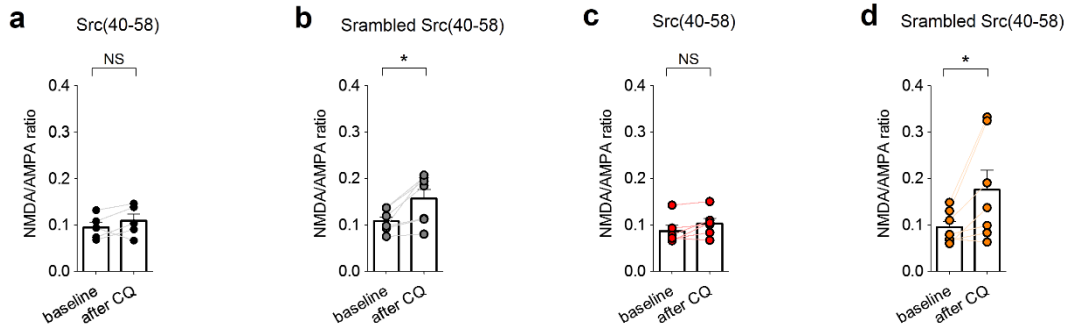

**Supplementary Fig. 8. Src-inhibitory peptide blocks CQ-dependent NMDAR activation**

(a-d) Src-inhibitory peptide, Src(40-58), but not its scrambled version, sSrc(40-58), blocks CQ-dependent NMDAR activation, as measured by the NMDA/AMPA ratio at -40 mV. (Src(40-58), n = 5 cells (4 animals) for WT and 6(4) for KO; sSrc(40-58), n = 7 (5) for WT and 7(6) for KO, NS, not significant, \*p < 0.05, Student's t-test). Data in all panels with error bars represent mean ± s.e.m.

**Suppl Fig 9**

**a**

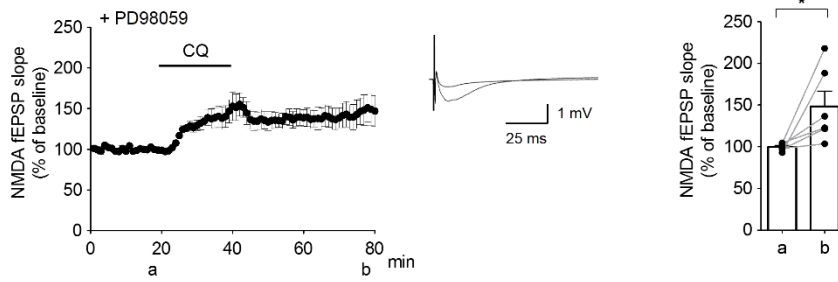

**b**

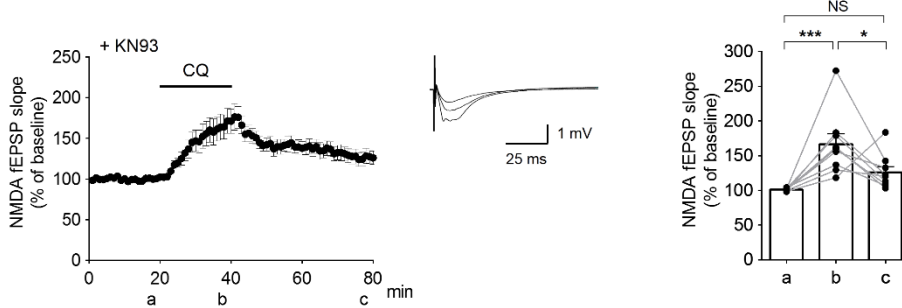

**Supplementary Fig. 9.** CaMKII $\alpha$  is required for the maintenance of the enhanced NMDAR function induced by CQ.

(a and b) WT hippocampal slices were treated with CQ (4  $\mu$ M) for 20 min in the presence of PD98059 (MAPKK/MEK inhibitor) or KN93 (CaMKII $\alpha$  inhibitor) and measured of NMDA fEPSPs. (PD98059, n = 6 slices (4 animals); KN93, n = 9 (4), \*p < 0.05, \*\*\*p < 0.001, Student's t-test and repeated measures ANOVA). Data in all panels with error bars represent mean  $\pm$  s.e.m.

Suppl Fig 10

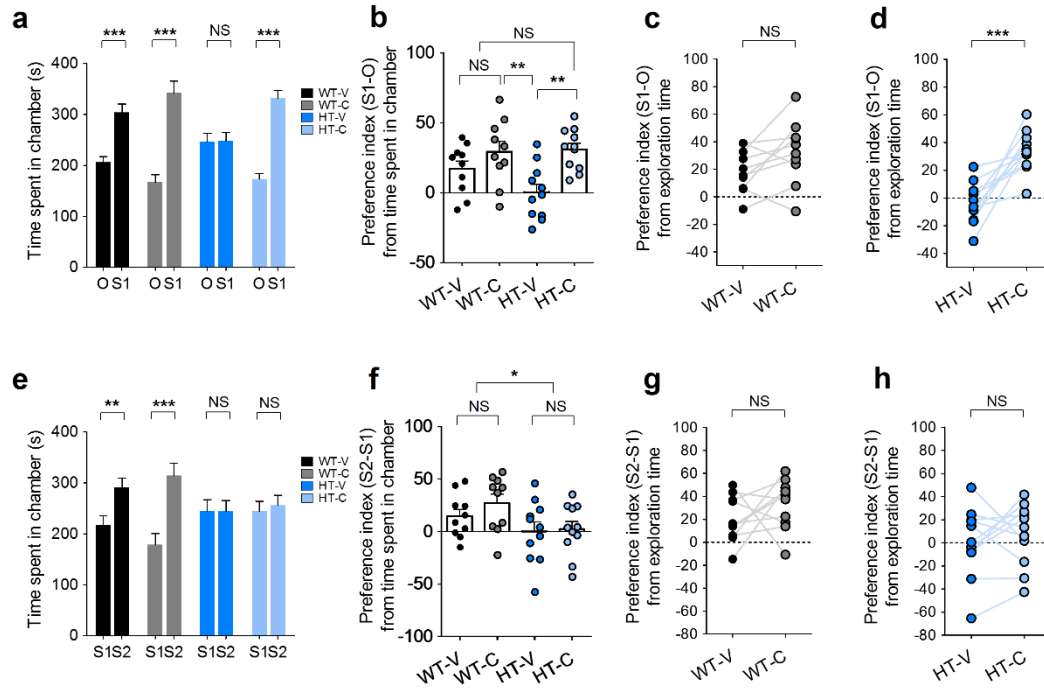

**Supplementary Fig. 10.** CQ improves social interaction in *Tbr1*<sup>+/-</sup> (HT) mice

(a-h) CQ improves social interaction (a-d) but has no effect on social novelty recognition (e-h) in *Tbr1*<sup>+/-</sup> mice, or on both parameters (social interaction and social novelty recognition) in WT littermates, as determined by the times spent in exploring/sniffing the targets (S1/strangers vs. O/object, or S2/new stranger vs. S1/old stranger). The paired comparisons of the effects of CQ (before and after) within the WT or HT group were made to minimize carryover effects. (n = 10 for WT-V and WT-C, n = 11 for HT-V and HT-C, NS, not significant, \*p < 0.05, \*\*\*p < 0.001, Student's t-test, two-way ANOVA and one-way ANOVA with Tukey's *post hoc* test). Data in all panels with error bars represent mean ± s.e.m.

Suppl Fig 11

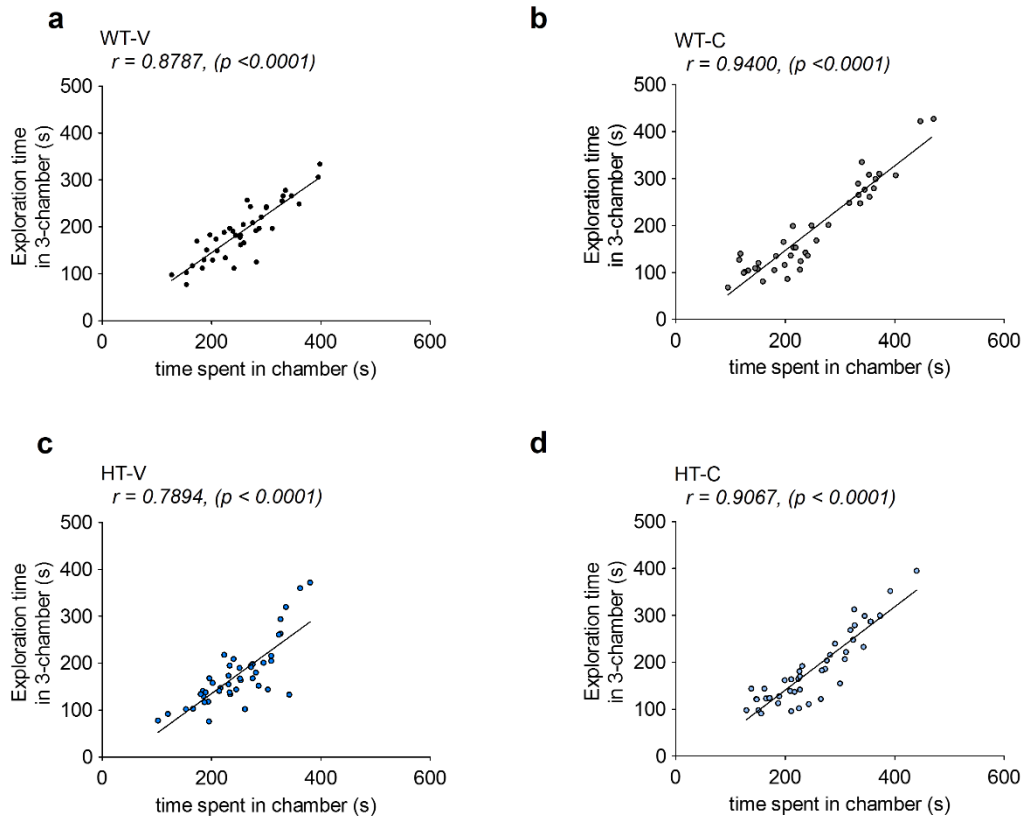

**Supplementary Fig. 11.** Strong correlation between chamber time and exploration time in *Tbr1*<sup>+/-</sup> (HT) mice.

(a-d) Time spent in chamber (chamber time) and time spent in exploring/sniffing the targets (O, S1, and S2) (exploration time) correlate well in *Tbr1*<sup>+/-</sup> mice at levels comparable to that in WT mice, as determined using the data from the three-chamber social interaction results from **Fig. 7** and **Supplementary Fig. 10** (Pearson correlation).

Suppl Fig 12

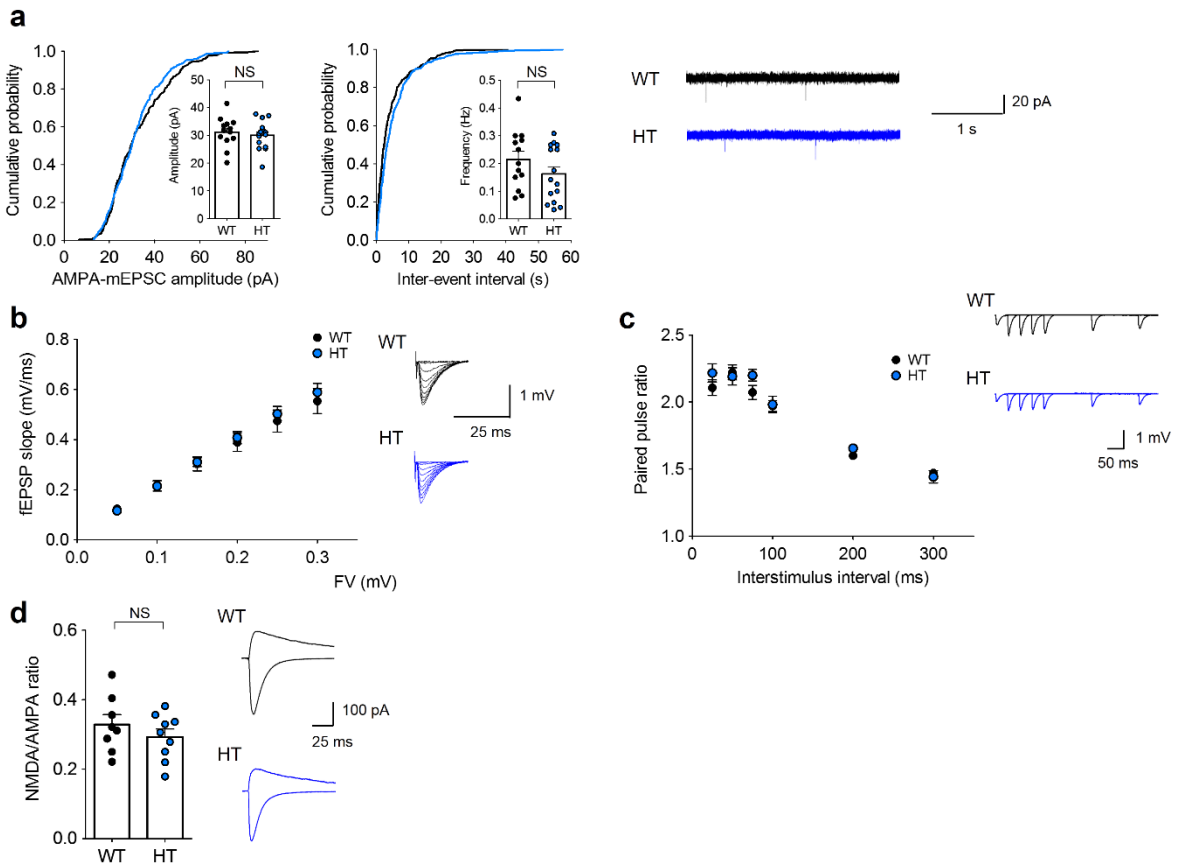

**Supplementary Fig. 12.** *Tbr1*<sup>+/-</sup> hippocampal SC-CA1 synapses show normal excitatory synaptic transmission

(a) *Tbr1*<sup>+/-</sup> hippocampal CA1 pyramidal neurons (3-5 weeks) show normal mEPSC amplitude and frequency. (n = 13 cells, 3 animals for WT, and 15 (3) for HT, NS, not significant, Student's t-test).

(b) *Tbr1*<sup>+/-</sup> hippocampal SC-CA1 synapses (3-5 weeks) show normal input-output ratio. (n = 10 slices, 3 animals for WT and HT; Student's t-test).

(c) *Tbr1*<sup>+/-</sup> hippocampal SC-CA1 synapses (3-5 weeks) show normal paired pulse ratio. (n = 10 slices, 3 animals for WT and HT; Student's t-test).

(d) *Tbr1*<sup>+/-</sup> hippocampal SC-CA1 synapses (3-5 weeks) show normal NMDA/AMPA ratio. (n = 8 cells (4 animals) for WT, 9 (5) for HT; Student's t-test). Data in all panels with error bars represent mean ± s.e.m.

Suppl Fig 13

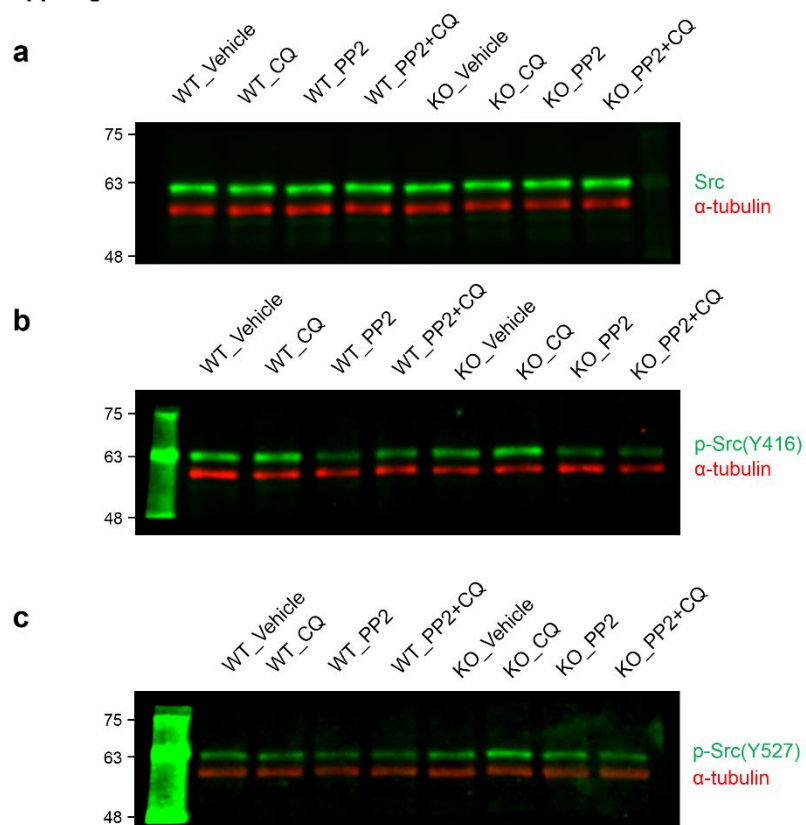

**Supplementary Fig. 13.** Full-size immunoblot images for Src phosphorylation in **Fig. 6a,d**.

(a) Total Src.

(b) Src phosphorylation at Y416.

(c) Src phosphorylation at Y527.
